# Supplementary material for: A Switch from Cell-Associated to Soluble PDGF-B Protects against Atherosclerosis, despite Driving Extramedullary Hematopoiesis
Source: MDPI journal article supplement (doi:10.3390/cells10071746), 2021-07-10
Supplement: s1 [file s1]

## **SUPPLEMENTARY MATERIALS**

### **A switch from cell-associated to soluble PDGF-B protects against atherosclerosis, despite driving extramedullary hematopoiesis**

Renée J.H.A. Tillie<sup>1</sup>, Thomas L. Theelen<sup>1</sup>, Kim van Kuijk<sup>1</sup>, Lieve Temmerman<sup>1</sup>, Jenny de Bruijn<sup>1</sup>, Marion Gijbels<sup>1-3</sup>, Christer Betsholtz<sup>4</sup>, Erik A.L. Biessen<sup>1,5</sup>, Judith C. Sluimer<sup>1,6</sup>

1. Department of Pathology, Cardiovascular Research Institute Maastricht (CARIM) Maastricht University Medical Center, Maastricht, the Netherlands
2. Department of Pathology, GROW-School for Oncology and Developmental Biology, Maastricht University Medical Center, Maastricht, the Netherlands
3. Department of Medical Biochemistry, Experimental Vascular Biology, Amsterdam UMC, University of Amsterdam, Amsterdam, the Netherlands
4. Department of Immunology, Genetics and Pathology, Uppsala University, Rudbeck Laboratory, Uppsala, Sweden
5. Institute for Molecular Cardiovascular Research (IMCAR), RWTH Aachen University, Aachen, Germany
6. BHF Centre for Cardiovascular Sciences (CVS), University of Edinburgh, Edinburgh, UK

## **Supplementary Materials and Methods**

### **S1. Plasma cholesterol and triglyceride levels**

Standard enzymatic techniques were used to assess plasma cholesterol (CHOD-PAP method – Cholesterol FS Ecoline no. 113009990314; DiaSys – Diagnostic Systems GmbH) and plasma triglycerides (FS5' Ecoline no. 157609990314; DiaSys – Diagnostic Systems GmbH) automated on the Cobas Fara centrifugal analyzer (Roche).

### **S2. Pro-inflammatory cytokines in plasma and BMDM conditioned medium**

Cytokine levels in plasma and BMDM conditioned medium were assessed using a V-PLEX Proinflammatory Panel 1 Mouse Kit following manufacturer's protocol (K15048D-1, Meso Scale Diagnostics).

## Supplementary Tables

**Table S1:** Immunohistochemical staining protocols of murine aortic root cryosections

|                                                               | <b>αSMA</b><br>Double staining<br>with CD31                                                     | <b>CD31</b><br>Double<br>staining with<br>αSMA                                   | <b>PDGF-B</b>                                                         | <b>MOMA-2</b>                                                                                                        |
|---------------------------------------------------------------|-------------------------------------------------------------------------------------------------|----------------------------------------------------------------------------------|-----------------------------------------------------------------------|----------------------------------------------------------------------------------------------------------------------|
| <b>Fixation</b>                                               | Dry acetone                                                                                     |                                                                                  | 4% PFA in PBS                                                         | Dry acetone                                                                                                          |
| <b>Permeabilization</b>                                       | -                                                                                               |                                                                                  | 0.25% Triton-x100 in PBS                                              | -                                                                                                                    |
| <b>Blocking</b>                                               | 0.3% H <sub>2</sub> O <sub>2</sub> in methanol<br><br>Serum-free protein block<br>(X0909, DAKO) |                                                                                  | 0.3% H <sub>2</sub> O <sub>2</sub> in<br>methanol                     | 0.3% H <sub>2</sub> O <sub>2</sub> in<br>methanol<br><br>PBS 4% FCS<br>and avidin<br>block 1:5 (SP-<br>2001, Vector) |
| <b>Primary<br/>antibody<br/>Cat. no and<br/>company</b>       | F3777, Sigma<br>FITC-conjugated                                                                 | 550274, BD                                                                       | Ab23914, Abcam                                                        | Molecular<br>Genetics<br>department<br>Maastricht<br>University                                                      |
| <b>Primary<br/>antibody<br/>dilution and<br/>buffer</b>       | 1:300<br>TBS                                                                                    | 1:25<br>TBS                                                                      | 1:700<br>TBT (TBS + 1%<br>BSA + 0.1%<br>Tween)                        | 1:50<br>PBS, 4% FCS,<br>biotin block 1:5<br>(SP-2001,<br>Vector)                                                     |
| <b>Secondary<br/>antibody<br/>Cat. no and<br/>company</b>     | Sheep anti-FITC-<br>HRP,<br>11.426.346.910<br>Roche                                             | Biotinylated<br>rabbit anti-<br>rat, BA-<br>4001, Vector                         | Brightvision poly-<br>HRP-anti-rabbit,<br>DPVR-55-HRP,<br>Immunologic | Biotinylated<br>rabbit anti-rat,<br>Molecular<br>Genetics<br>department<br>Maastricht<br>University                  |
| <b>Secondary<br/>antibody<br/>dilution and<br/>buffer</b>     | 1:300<br>TBS                                                                                    | 1:200<br>TBS                                                                     | -                                                                     | 1:300<br>PBS, 2%<br>normal mouse<br>serum (X0910,<br>DAKO), 4%<br>FCS                                                |
| <b>Tertiary<br/>step/antibody<br/>Cat. no and<br/>company</b> | -                                                                                               | ABC-AP kit<br>(AK-5000,<br>Vector)                                               | -                                                                     | ABC-HRP kit<br>(PK-4000,<br>Vector)                                                                                  |
| <b>Stain<br/>development</b>                                  | Diaminobenzidine<br>kit (K346811-2,<br>Agilent)                                                 | Vector Blue<br>substrate kit,<br>alkaline<br>phosphatase<br>(SK-5300,<br>Vector) | Diaminobenzidine<br>kit (K346811-2,<br>Agilent)                       | AEC kit (2%<br>buffer, 3%<br>AEC, 2% H <sub>2</sub> O <sub>2</sub><br>in milliQ,<br>K3461, DAKO)                     |

FCS; fetal calf serum, PBS; phosphate-buffered saline, PFA; paraformaldehyde, TBS; tris-buffered saline.

**Table S2:** Primer sets used for genotype confirmation through PCR and electrophoresis

| <b>Gene</b>                 | <b>Forward primer (5' - 3')</b> | <b>Reverse primer (5' - 3')</b> |
|-----------------------------|---------------------------------|---------------------------------|
| <i>Pdgfb</i> <sup>WT</sup>  | CATGCTGCCTTGTAATCCGTTT          | CGGCGGATTCTCACCGT               |
| <i>Pdgfb</i> <sup>ret</sup> | CTCGGGTGACCATTCGGTAA            | TCTAAGTCACAGCCAGGGAGT<br>AGC    |

**Table S3:** Primer sets used for qPCR

| <b>Gene</b>     | <b>Forward primer (5' - 3')</b> | <b>Reverse primer (5' - 3')</b> |
|-----------------|---------------------------------|---------------------------------|
| <i>18s rRNA</i> | GTAACCCGTTGAACCCCAT             | CCATCCAATCGGTAGTAGCG            |
| <i>Pdgfb</i>    | CGGTCCAGGTGAGAAAGATTG           | CGTCTTGGCTCGCTGCTC              |
| <i>Pdgfra</i>   | AGAGAGAATCGGCCCCAGTG            | CCATAGCTCCTGAGACCCGC            |
| <i>Pdgrb</i>    | GGCCTTAGTGGTCCTTACCG            | GCACAGGGTCCACGTAGATG            |

**Table S4:** Antibodies used for flow cytometry

| <b>Antibody</b>         | <b>Company</b>  | <b>Catalog number</b> | <b>Dilution used</b> |
|-------------------------|-----------------|-----------------------|----------------------|
| CD16/32                 | eBioscience     | 14-0161-82            | 1:100                |
| CD45 PerCP              | Biolegend       | 103130                | 1:100                |
| CD3 eFluor 450          | eBioscience     | 48-0032-82            | 1:100                |
| NK-1.1 PE               | BD Pharmingen   | 557391                | 1:100                |
| Ly6G APC-Cy7            | BD Pharmingen   | 560600                | 1:100                |
| CD11b PE-Cy7            | BD Pharmingen   | 552850                | 1:300                |
| Ly-6C APC               | Miltenyi Biotec | 130-102-341           | 1:10                 |
| CD4 APC-H7              | BD Pharmingen   | 560181                | 1:100                |
| CD8 V500                | BD Horizon      | 560776                | 1:200                |
| CD8 FITC                | eBioscience     | 11-0081-85            | 1:50                 |
| B220 V500               | BD Horizon      | 561226                | 1:50                 |
| Sca-1 PerCP-Cyanine 5.5 | eBioscience     | 45-5981-82            | 1:1000               |
| c-Kit APC-eFluor780     | eBioscience     | 47-1171-82            | 1:100                |
| CD34 eFluor450          | eBioscience     | 48-0341-82            | 1:50                 |
| CD16/32 PE-Cy7          | eBioscience     | 25-0161-82            | 1:1000               |
| B220 PE                 | BD Pharmingen   | 553089                | 1:100                |
| CD3 PE                  | eBioscience     | 12-0031-82            | 1:800                |
| CD11b PE                | eBioscience     | 12-0112-82            | 1:800                |
| Ly-6G PE                | BD Pharmingen   | 551461                | 1:100                |
| NK-1.1 PE               | BD Pharmingen   | 557391                | 1:100                |
| TER-119 PE              | eBioscience     | 12-5921-82            | 1:200                |

## Supplementary Figures

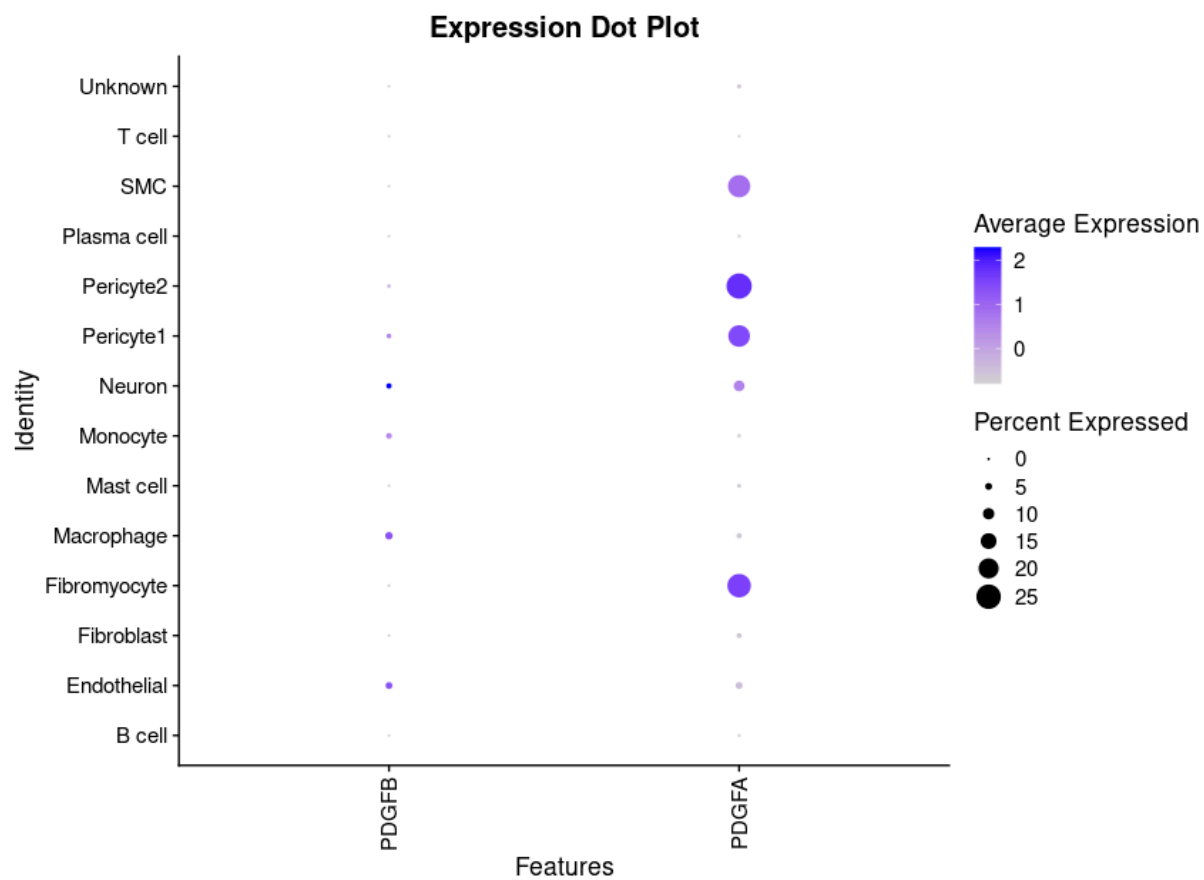

**Figure S1: *PDGFB* and *PDGFA* expression in human atherosclerosis**

Dot plot of *PDGFB* and *PDGFA* expression in single cell populations of human atherosclerotic coronary arteries (Wirka et al. [21]). SMC; smooth muscle cell.

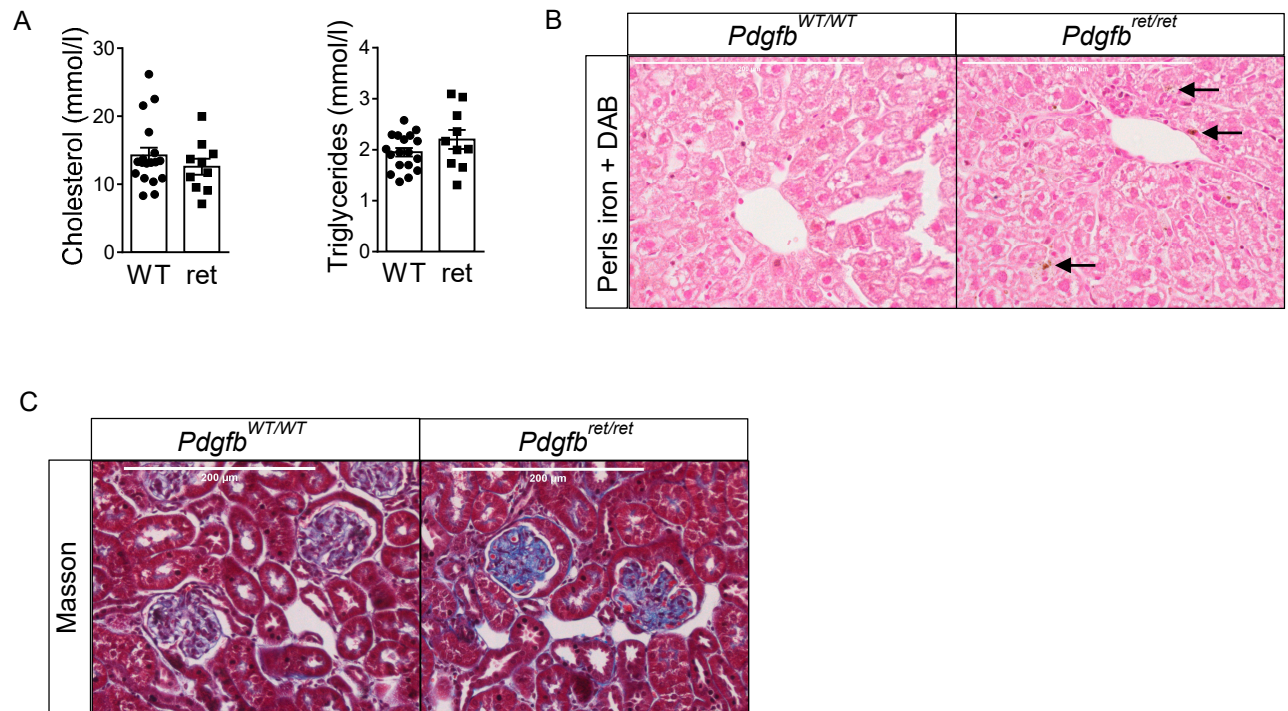

**Figure S2: Similar cholesterol and triglyceride levels in *Pdgfb*<sup>WT/WT</sup> and *Pdgfb*<sup>ret/ret</sup> plasma and affected *Pdgfb*<sup>ret/ret</sup> liver and kidney**

(A) Cholesterol and triglyceride levels in *Pdgfb*<sup>WT/WT</sup> ( $n=18$ ) and *Pdgfb*<sup>ret/ret</sup> ( $n=10$ ) plasma. (B) Representative photomicrographs of Perls iron staining combined with DAB in *Pdgfb*<sup>WT/WT</sup> and *Pdgfb*<sup>ret/ret</sup> liver. (C) Representative photomicrographs of Masson staining in *Pdgfb*<sup>WT/WT</sup> and *Pdgfb*<sup>ret/ret</sup> kidney, in which ECM is stained blue. Scale bars 200  $\mu$ m. Data were tested for normality (Shapiro-Wilk) and equal variances (F-test). Variables that did not pass, were analyzed using Mann-Whitney U test. Variables that did pass, were analyzed using Student's t-test.



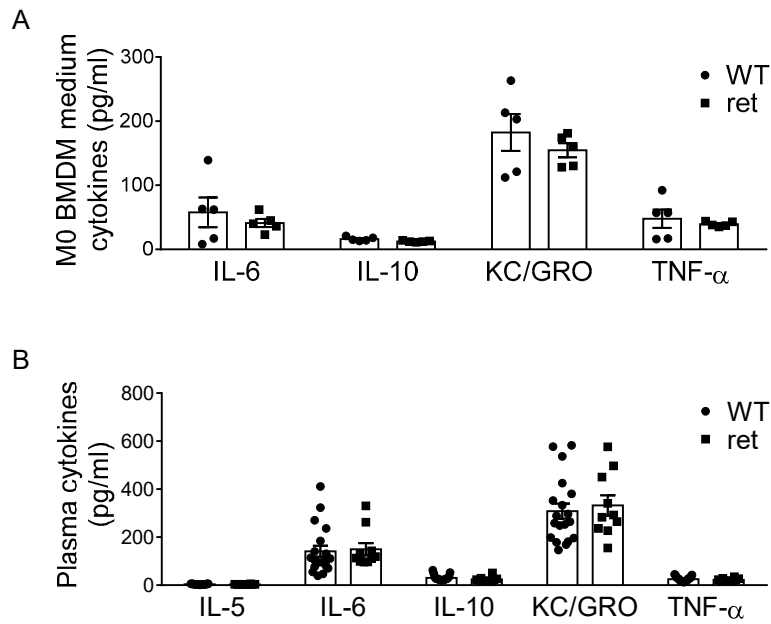

**Figure S3: Pro-inflammatory cytokine levels in plasma and BMDM conditioned medium unaffected.** (A) Levels of interleukin 6 (IL-6), IL-10, keratinocyte-derived chemokine/growth-related oncogene (KC/GRO or CXCL1) and tumor necrosis factor- $\alpha$  (TNF $\alpha$ ) in BMDM-derived medium ( $n=5$ ). IFN- $\gamma$ , IL-1 $\beta$ , IL-5, IL-12 p70, IL-2 and IL-4 levels were undetectable. (B) Levels of IL-5, IL-6, IL-10, KC/GRO and TNF- $\alpha$  in *Pdgfb*<sup>WT/WT</sup> ( $n=19$ ) and *Pdgfb*<sup>ret/ret</sup> ( $n=10$ ) plasma. IFN- $\gamma$ , IL-1 $\beta$ , IL-12 p70, IL-2 and IL-4 levels were undetectable. Graphs represent mean $\pm$ SEM. Data were analyzed using two-way ANOVA.

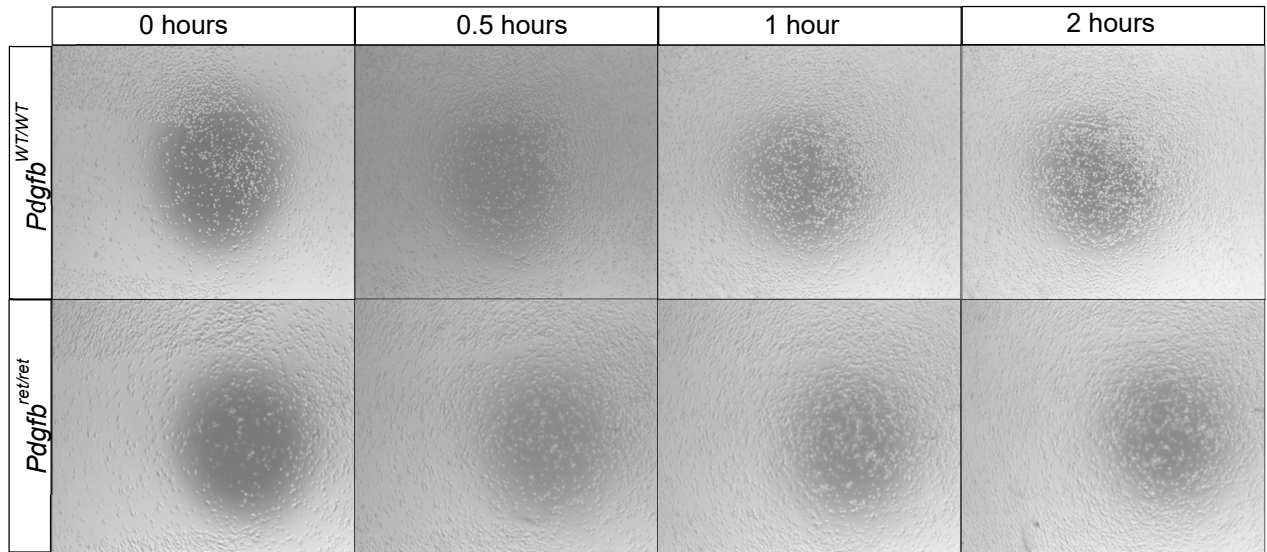

**Figure S4: Pictures of BMDM scratch assay to assess migration *in vitro*.**  
Representative pictures of *Pdgfb*<sup>WT/WT</sup> and *Pdgfb*<sup>ret/ret</sup> BMDM migration over time (t=0, 0.5 hours, 1 hour and 2 hours) after scratch infliction.

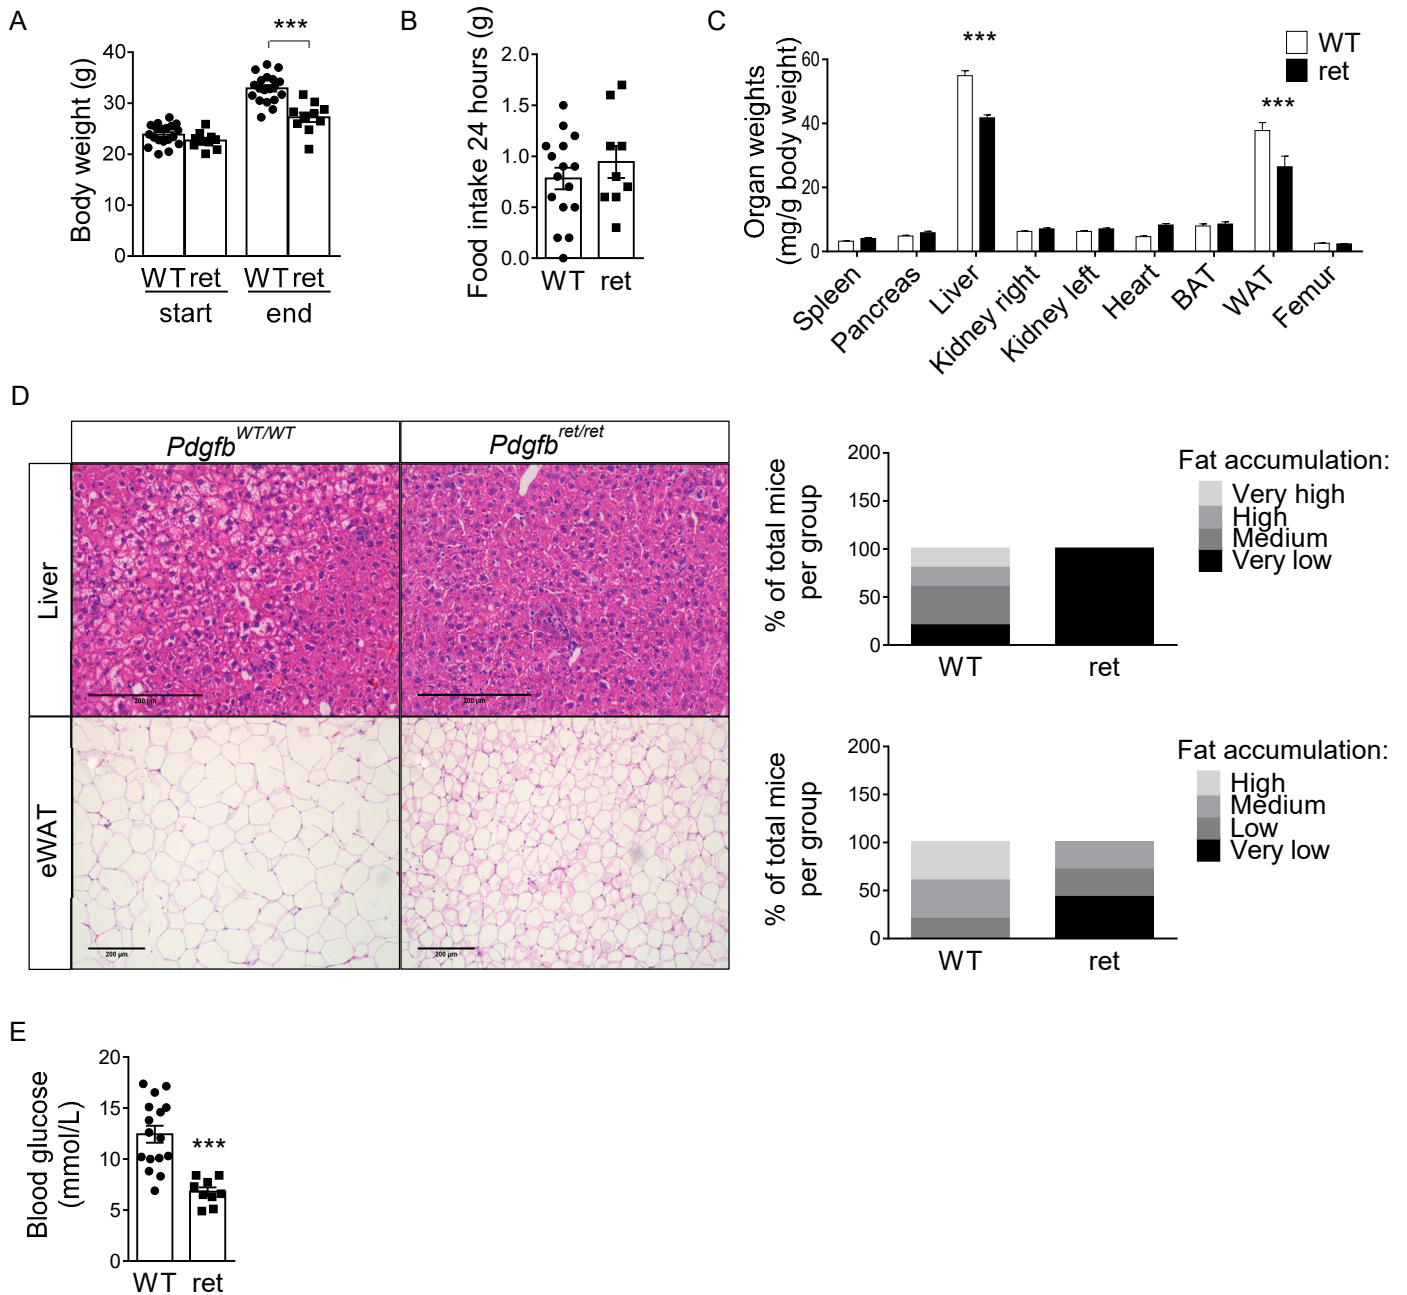

**Figure S5: Decreased body weight gain and fat accumulation in *Pdgfb*<sup>ret/ret</sup> liver and epididymal white adipose tissue (eWAT).** (A) *Pdgfb*<sup>WT/WT</sup> (*n*=19) and *Pdgfb*<sup>ret/ret</sup> (*n*=10) body weight before and after 10 weeks of high cholesterol diet (HCD) (B) 24-hour food intake as assessed in metabolic cages, in the 9<sup>th</sup> week of HCD. (C) Organ weights after 10 weeks of HCD, relative to body weight. (D) Fat accumulation as assessed by visual analogue scores ranging from very low to very high fat accumulation in HE-stained *Pdgfb*<sup>WT/WT</sup> (*n*=5) and *Pdgfb*<sup>ret/ret</sup> (*n*=7) liver and eWAT, with corresponding photomicrographs. (E) Blood glucose levels after 10 weeks of HCD. Results shown in B, C and E were obtained using 16 *Pdgfb*<sup>WT/WT</sup> and 9 *Pdgfb*<sup>ret/ret</sup> mice. Scale bars 200 μm. Graphs represent mean±SEM. \*\*\**p*<0.001. Data were tested for normality (Shapiro-Wilk) and equal variances (F-test). Variables that did not pass, were analyzed using Mann-Whitney U test. Variables that did pass, were analyzed using Student's t-test. Data in A and C were analyzed using two-way ANOVA, including Bonferroni's multiple comparisons test.

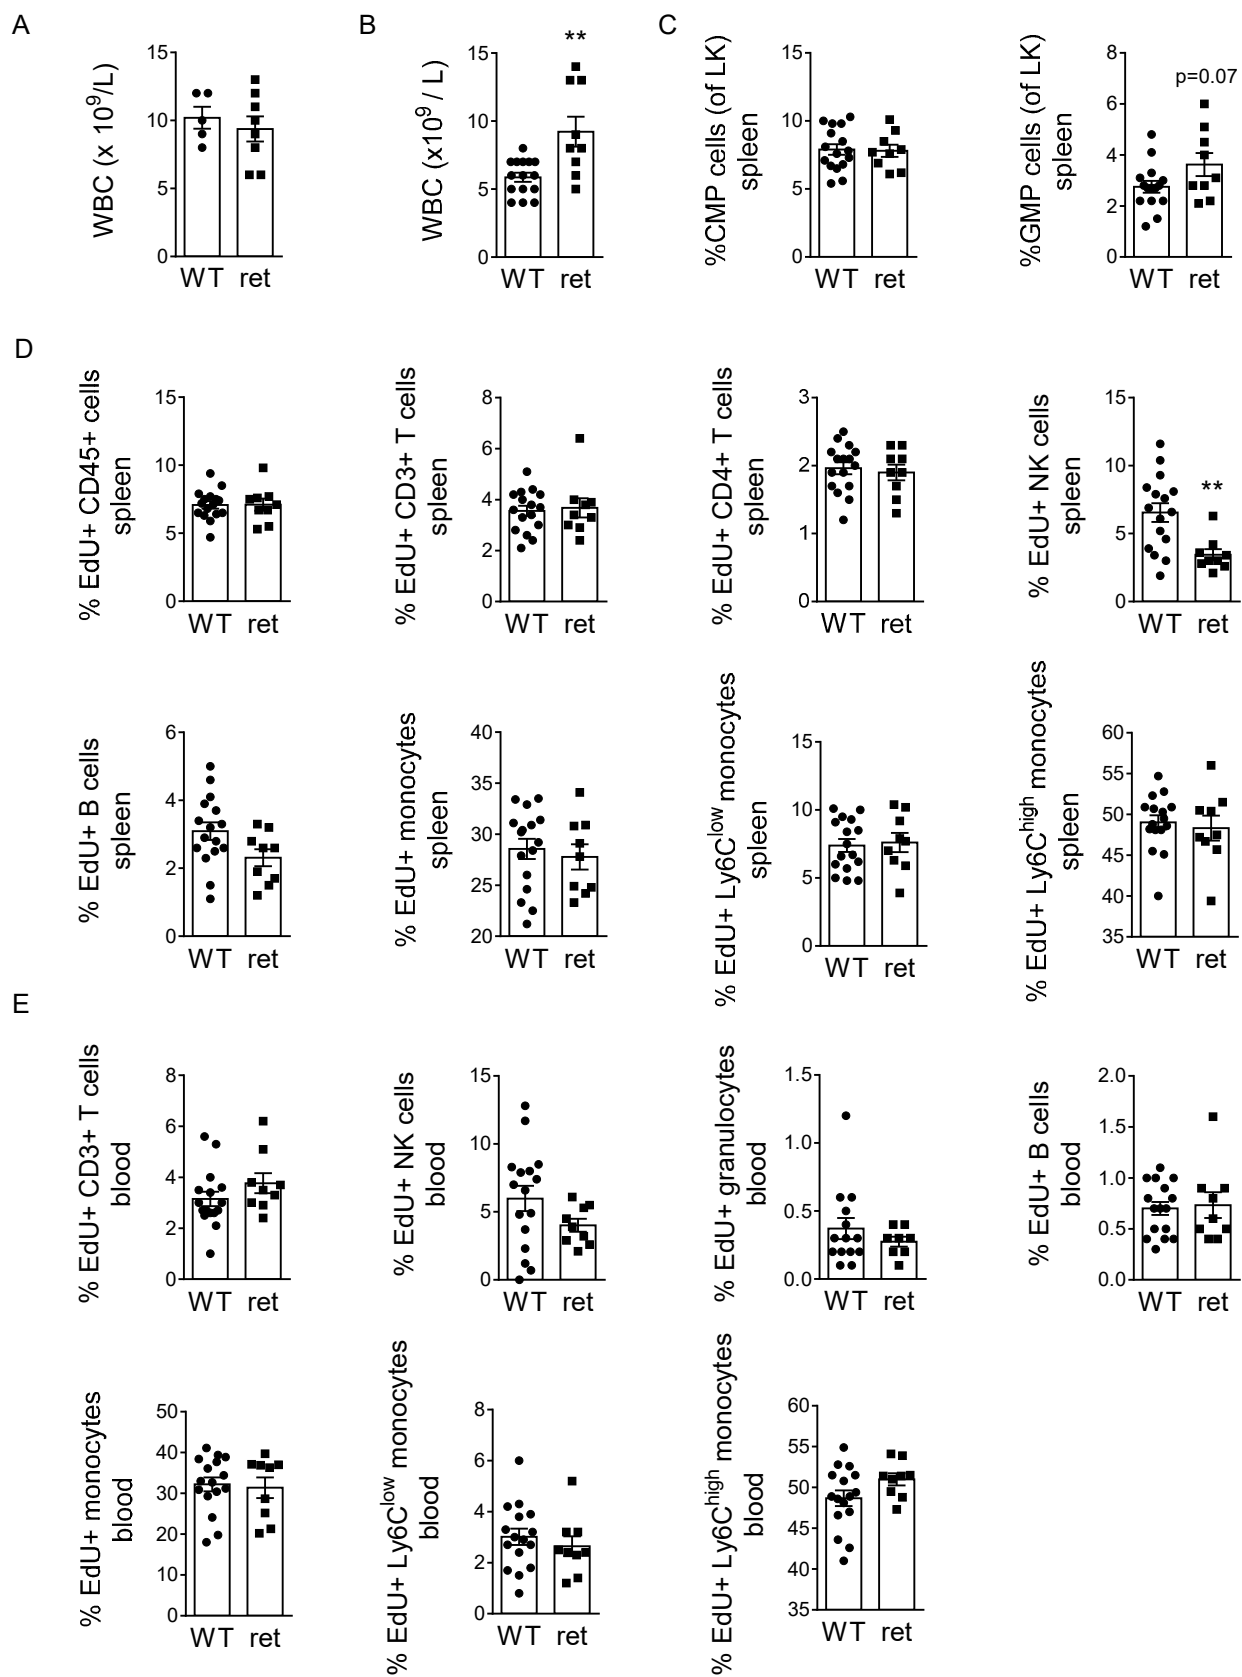

**Figure S6: *Pdgfb*<sup>ret/ret</sup> leukocytosis confirmation in second mouse experiment after HCD and percentages of EdU positive leukocytes in blood and spleen.** (A) White blood cell (WBC) counts in blood from *Pdgfb*<sup>WT/WT</sup>(*n*=5) and *Pdgfb*<sup>ret/ret</sup>(*n*=8) mice on standard laboratory diet. (B) WBC counts in *Pdgfb*<sup>WT/WT</sup>(*n*=15) and *Pdgfb*<sup>ret/ret</sup>(*n*=9) blood after 10 weeks HCD in the second mouse experiment. (C) Percentage progenitor cells of lineage-c-Kit<sup>+</sup> in *Pdgfb*<sup>WT/WT</sup>(*n*=15-16) and *Pdgfb*<sup>ret/ret</sup>(*n*=9) spleen. CMP = common myeloid progenitor, GMP = granulocyte monocyte progenitor. (D) Percentage of EdU positive leukocytes in *Pdgfb*<sup>WT/WT</sup>(*n*=14-16) and *Pdgfb*<sup>ret/ret</sup>(*n*=9) spleen and (E) blood. Graphs represent mean±SEM. \*\**p*<0.01. Data were tested for normality (Shapiro-Wilk) and equal variances (F-test). Variables that did not pass, were analyzed using Mann-Whitney U test. Variables that did pass, were analyzed using Student's t-test.
